# Supplementary material
Source: publisher figshare collection journal article supplement (https://tandf.figshare.com/ndownloader/files/17710634)
Supplement: Supplementary file 1 [file 17710634]

| **Solid malignancy** | Oral and pharyngeal | C00 - C14 |
| --- | --- | --- |
| Esophagus | C15 |
| Stomach | C16 |
| Colon and rectum | C18 - C20 |
| Liver | C22 |
| Gallbladder and biliary tract | C23, C24 |
| Pancreas | C25 |
| Larynx | C32 |
| Lung | C33, C34 |
| Breast | C50 |
| Cervix uteri | C53 |
| Corpus uteri | C54 |
| Ovary | C56 |
| Prostate | C61 |
| Testis | C62 |
| Kidney | C64 |
| Bladder | C67 |
| Brain and CNS | C70 - C72 |
| Thyroid | C73 |
| Other and unspecified malignant neoplasms of solid organs | C17, C21, C26 - C31, C35 -C49, C51, C52, C55, C57 -C60, C63, C65, C66, C68, C69, C74 -80, C86 - C89, C97 |
| **Hematologic malignancy** | Hodgkin lymphoma | C81 |
| Non-Hodgkin lymphoma | C82 - C85 |
| Multiple myeloma | C90 |
| Leukemia | C91 - C95 |
| Other and unspecified malignant neoplasms of lymphoid, hematopoietic and related tissue | C96 |

**Supplementary Table 1** Categorization of solid and hematologic malignancies for estimation of the incidence rate of both idiopathic inflammatory myositis and knee osteoarthritis patients

The subcategorization of malignancy in this study reflects the International Statistical Classification of Diseases and Related Health Problems, 10th revision (ICD-10).

**Supplementary Table 2** The crude incidence rate of malignancies in Korean knee osteoarthritis patients

| **Sex** | **Number of patients  (N)** | **Overall malignancy** | | | **Solid malignancy** | | | **Hematologic malignancy** | | |
| --- | --- | --- | --- | --- | --- | --- | --- | --- | --- | --- |
| Total PY | Number of events  (N) | IRa (95% CI) | Total PY | Number of events  (N) | IRa (95% CI) | Total PY | Number of events  (N) | IRa (95% CI) |
| Total | 5,476,302 | 16,051,141.8 | 295,552 | 184.1 (183.5-184.8) | 16,061,162.0 | 288,915.0 | 179.9  (179.2-180.5) | 16,511,483.0 | 10,382.0 | 6.3  (6.2-6.4) |
| Male | 1,652,850 | 4,532,883 | 127,814 | 282.0 (280.4-283.5) | 4,536,363.7 | 125,417.0 | 276.5  (274.9-278.0) | 4,723,913.0 | 3,982.0 | 8.4  (8.2-8.7) |
| Female | 3,823,452 | 11,518,259 | 167,738 | 145.6 (144.9-146.3) | 11,524,798.2 | 163,498.0 | 141.9  (141.2-142.6) | 11,787,570.0 | 6,400.0 | 5.4  (5.3-5.6) |

a Incidence rate is presented as the number of events per 10,000 person-years.

*Abbreviations*: *OA* osteoarthritis, *PY* person-years, *IR* incidence rate, *CI* confidence interval
